# Supplementary material for: Molecular typing and profiling of topoisomerase mutations causing resistance to ciprofloxacin and levofloxacin in Elizabethkingia species
Source: PeerJ. 2018 Sep 12;6:e5608. doi: 10.7717/peerj.5608 (PMC6139017; doi:10.7717/peerj.5608)
Supplement: Supplemental Information 1 — All elizabethkingia species collected in our study, with MIC values against ciprofloxacin and levofloxacin. We also calculated antimicrobial susceptibility percentage with susceptible/intermediate/resistant in all isolates. [file peerj-06-5608-s001.xlsx]

## Sheet: All isolates in the study
9 strains
paper name	name	bacteria species	CIP	LEVO
EM-001	BCMI_036	Elizabethkingia meningoseptica	2	<=0.5
EM-002	BCMI_041	Elizabethkingia meningoseptica	2	<=0.5
EM-003	BCMI_043	Elizabethkingia meningoseptica	2	1
EM-004	CMI01_002	Elizabethkingia meningoseptica	>32	>32
EM-005	CMI01_037	Elizabethkingia meningoseptica	32	>32
EM-006	CMI01_051	Elizabethkingia meningoseptica	2	2
EM-007	CMI01_052	Elizabethkingia meningoseptica	32	>32
EM-008	CMI01_099	Elizabethkingia meningoseptica	32	16
EM-009	CMI02_004	Elizabethkingia meningoseptica	2	1
111 strains
paper name	name	bacteria species	CIP	LEVO
EA-001	CMI01_004	Elizabethkingia anophelis	32	8
EA-002	CMI01_005	Elizabethkingia anophelis	>32	>32
EA-003	CMI01_006	Elizabethkingia anophelis	32	>32
EA-004	CMI01_007	Elizabethkingia anophelis	32	32
EA-005	CMI01_010	Elizabethkingia anophelis	32	16
EA-006	CMI01_011	Elizabethkingia anophelis	>32	>32
EA-007	CMI01_013	Elizabethkingia anophelis	32	>32
EA-008	CMI01_014	Elizabethkingia anophelis	32	>32
EA-009	CMI01_015	Elizabethkingia anophelis	>32	>32
EA-010	CMI01_016	Elizabethkingia anophelis	>32	>32
EA-011	CMI01_017	Elizabethkingia anophelis	1	<=0.5
EA-012	CMI01_020	Elizabethkingia anophelis	32	>32
EA-013	CMI01_021	Elizabethkingia anophelis	1	<=0.5
EA-014	CMI01_023	Elizabethkingia anophelis	32	>32
EA-015	CMI01_024	Elizabethkingia anophelis	32	>32
EA-016	CMI01_027	Elizabethkingia anophelis	32	32
EA-017	CMI01_030	Elizabethkingia anophelis	32	>32
EA-018	CMI01_032	Elizabethkingia anophelis	32	16
EA-019	CMI01_034	Elizabethkingia anophelis	32	>32
EA-020	CMI01_035	Elizabethkingia anophelis	32	>32
EA-021	CMI01_036	Elizabethkingia anophelis	32	>32
EA-022	CMI01_039	Elizabethkingia anophelis	32	>32
EA-023	CMI01_041	Elizabethkingia anophelis	32	>32
EA-024	CMI01_045	Elizabethkingia anophelis	32	32
EA-025	CMI01_046	Elizabethkingia anophelis	32	8
EA-026	CMI01_047	Elizabethkingia anophelis	32	32
EA-027	CMI01_048	Elizabethkingia anophelis	1	2
EA-028	CMI01_049	Elizabethkingia anophelis	32	>32
EA-029	CMI01_053	Elizabethkingia anophelis	1	1
EA-030	CMI01_054	Elizabethkingia anophelis	32	>32
EA-031	CMI01_055	Elizabethkingia anophelis	32	32
EA-032	CMI01_057	Elizabethkingia anophelis	32	16
EA-033	CMI01_058	Elizabethkingia anophelis	32	>32
EA-034	CMI01_060	Elizabethkingia anophelis	1	1
EA-035	CMI01_064	Elizabethkingia anophelis	32	>32
EA-036	CMI01_067	Elizabethkingia anophelis	32	32
EA-037	CMI01_068	Elizabethkingia anophelis	>32	>32
EA-038	CMI01_069	Elizabethkingia anophelis	32	32
EA-039	CMI01_070	Elizabethkingia anophelis	32	32
EA-040	CMI01_075	Elizabethkingia anophelis	32	32
EA-041	CMI01_076	Elizabethkingia anophelis	32	32
EA-042	CMI01_078	Elizabethkingia anophelis	32	32
EA-043	CMI01_079	Elizabethkingia anophelis	32	32
EA-044	CMI01_080	Elizabethkingia anophelis	32	32
EA-045	CMI01_083	Elizabethkingia anophelis	32	32
EA-046	CMI01_087	Elizabethkingia anophelis	32	32
EA-047	CMI01_089	Elizabethkingia anophelis	32	32
EA-048	CMI01_090	Elizabethkingia anophelis	32	32
EA-049	CMI01_091	Elizabethkingia anophelis	32	32
EA-050	CMI01_092	Elizabethkingia anophelis	32	16
EA-051	CMI01_094	Elizabethkingia anophelis	32	16
EA-052	CMI01_095	Elizabethkingia anophelis	2	1
EA-053	CMI01_096	Elizabethkingia anophelis	32	32
EA-054	CMI01_100	Elizabethkingia anophelis	32	32
EA-055	CMI02_001	Elizabethkingia anophelis	32	32
EA-056	CMI02_002	Elizabethkingia anophelis	2	1
EA-057	CMI02_003	Elizabethkingia anophelis	32	32
EA-058	CMI02_006	Elizabethkingia anophelis	32	32
EA-059	CMI02_007	Elizabethkingia anophelis	32	32
EA-060	CMI02_008	Elizabethkingia anophelis	32	32
EA-061	CMI02_009	Elizabethkingia anophelis	32	>32
EA-062	CMI02_012	Elizabethkingia anophelis	2	1
EA-063	CMI02_013	Elizabethkingia anophelis	32	32
EA-064	CMI02_017	Elizabethkingia anophelis	32	>32
EA-065	CMI02_020	Elizabethkingia anophelis	1	<=0.5
EA-066	CMI02_027	Elizabethkingia anophelis	>64	64
EA-067	CMI02_028	Elizabethkingia anophelis	>64	64
EA-068	CMI02_030	Elizabethkingia anophelis	1	<=0.5
EA-069	CMI02_033	Elizabethkingia anophelis	>64	64
EA-070	CMI02_034	Elizabethkingia anophelis	>64	16
EA-071	CMI02_035	Elizabethkingia anophelis	>64	64
EA-072	CMI02_036	Elizabethkingia anophelis	>64	32
EA-073	CMI02_037	Elizabethkingia anophelis	>64	64
EA-074	CMI02_039	Elizabethkingia anophelis	>64	32
EA-075	CMI02_043	Elizabethkingia anophelis	>64	64
EA-076	CMI02_045	Elizabethkingia anophelis	2	1
EA-077	CMI02_048	Elizabethkingia anophelis	>64	64
EA-078	CMI02_049	Elizabethkingia anophelis	>64	64
EA-079	CMI02_051	Elizabethkingia anophelis	>64	64
EA-080	CMI02_052	Elizabethkingia anophelis	>64	64
EA-081	CMI02_053	Elizabethkingia anophelis	<=0.5	<=0.5
EA-082	CMI02_056	Elizabethkingia anophelis	4	4
EA-083	CMI02_057	Elizabethkingia anophelis	>64	64
EA-084	CMI02_058	Elizabethkingia anophelis	>64	64
EA-085	CMI02_059	Elizabethkingia anophelis	4	2
EA-086	CMI02_060	Elizabethkingia anophelis	>64	64
EA-087	CMI02_061	Elizabethkingia anophelis	>64	64
EA-088	CMI02_063	Elizabethkingia anophelis	>64	64
EA-089	CMI02_064	Elizabethkingia anophelis	>64	32
EA-090	CMI02_065	Elizabethkingia anophelis	>64	64
EA-091	CMI02_066	Elizabethkingia anophelis	>64	64
EA-092	CMI02_067	Elizabethkingia anophelis	2	1
EA-093	CMI02_068	Elizabethkingia anophelis	>64	64
EA-094	CMI02_069	Elizabethkingia anophelis	>64	64
EA-095	CMI02_071	Elizabethkingia anophelis	>64	64
EA-096	CMI02_073	Elizabethkingia anophelis	32	8
EA-097	CMI02_074	Elizabethkingia anophelis	>64	64
EA-098	CMI02_075	Elizabethkingia anophelis	>64	32
EA-099	CMI02_079	Elizabethkingia anophelis	>64	32
EA-100	CMI02_080	Elizabethkingia anophelis	>64	64
EA-101	CMI02_081	Elizabethkingia anophelis	>64	16
EA-102	CMI02_083	Elizabethkingia anophelis	>64	64
EA-103	CMI02_086	Elizabethkingia anophelis	2	2
EA-104	CMI02_087	Elizabethkingia anophelis	>64	32
EA-105	CMI02_088	Elizabethkingia anophelis	>64	64
EA-106	CMI02_090	Elizabethkingia anophelis	1	1
EA-107	CMI02_092	Elizabethkingia anophelis	>64	64
EA-108	CMI02_093	Elizabethkingia anophelis	>64	64
EA-109	CMI02_094	Elizabethkingia anophelis	2	1
EA-110	CMI02_096	Elizabethkingia anophelis	>64	64
EA-111	CMI02_098	Elizabethkingia anophelis	>64	>64
11 strains
paper name	name	bacteria species	CIP	LEVO
Em-001	BCMI_011	Elizabethkingia miricola	2	1
Em-002	BCMI_030	Elizabethkingia miricola	2	<=0.5
Em-003	BCMI_031	Elizabethkingia miricola	2	1
Em-004	BCMI_034	Elizabethkingia miricola	1	<=0.5
Em-005	BCMI_042	Elizabethkingia miricola	1	<=0.5
Em-006	BCMI_044	Elizabethkingia miricola	2	1
Em-007	BCMI_045	Elizabethkingia miricola	2	1
Em-008	BCMI_071	Elizabethkingia miricola	<=1	1
Em-009	BCMI_073	Elizabethkingia miricola	32	16
Em-010	CMI01_072	Elizabethkingia miricola	32	4
Em-011	CMI01_093	Elizabethkingia miricola	32	4

## Sheet: MIC percentage
	EM	Ea	Em	total			EM	Ea	Em	total
CIP-S	0	9	3	12		CIP-S	0	0.0687023	0.0229008	0.0916031
CIP-I/R	9	102	8	119		CIP-I/R	0.0687023	0.778626	0.0610687	0.908397
total	9	111	11	131		total	0.0687023	0.847328	0.0839695	1
	EM	Ea	Em	total
CIP-S	0	0.0810811	0.272727	0.0916031
CIP-I/R	1	0.918919	0.727273	0.908397
total	1	1	1	1
	EM	Ea	Em	total			EM	Ea	Em	total
LEVO-S	5	17	8	30		LEVO-S	0.0381679	0.129771	0.0610687	0.229008
LEVO-I/R	4	94	3	101		LEVO-I/R	0.0305344	0.717557	0.0229008	0.770992
total	9	111	11	131		total	0.0687023	0.847328	0.0839695	1
	EM	Ea	Em	total
LEVO-S	0.555556	0.153153	0.727273	0.229008
LEVO-I/R	0.444444	0.846847	0.272727	0.770992
total	1	1	1	1
